# Supplementary material for: Population immunity to pre-Omicron and Omicron SARS-CoV-2 variants in US states and counties through December 1, 2021
Source: bioRxiv or medRxiv preprint supplement (doi:10.1101/2021.12.23.21268272), 2022-03-01

**Protection from infection or vaccination**

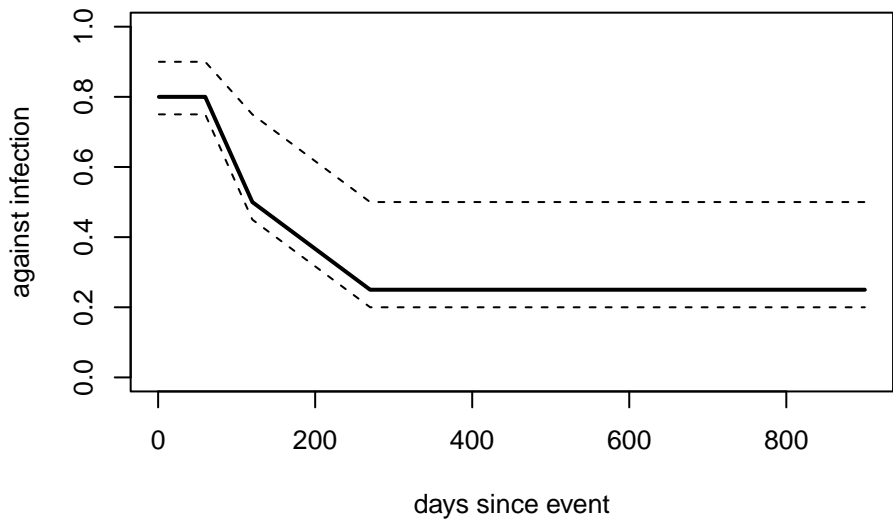

**Protection from infection and vaccination**

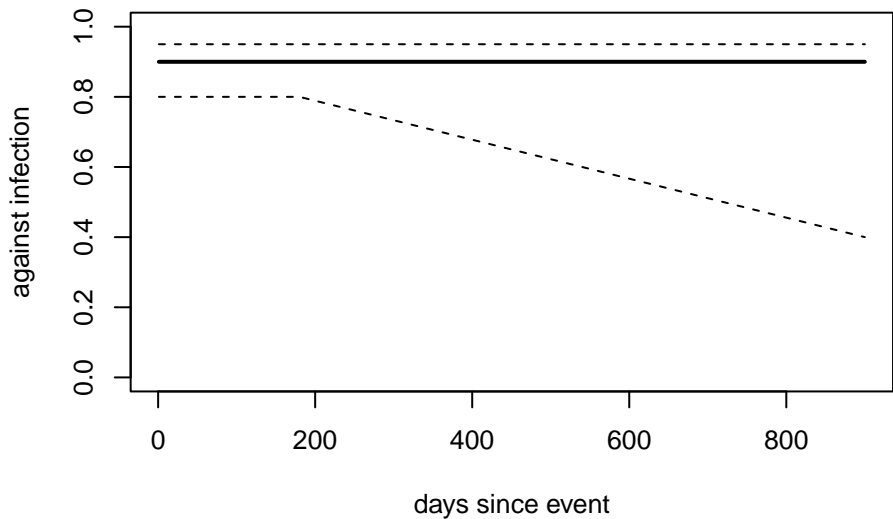

**Protection from infection or vaccination**

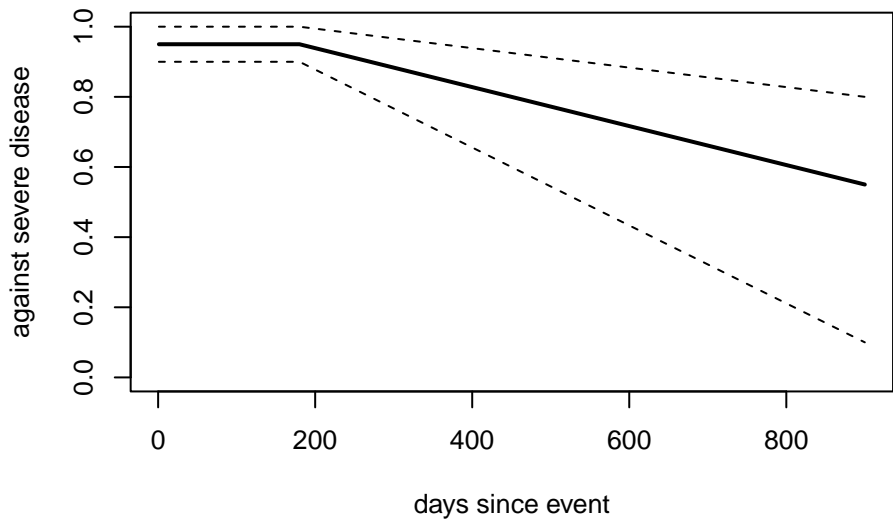

**Protection from infection and vaccination**

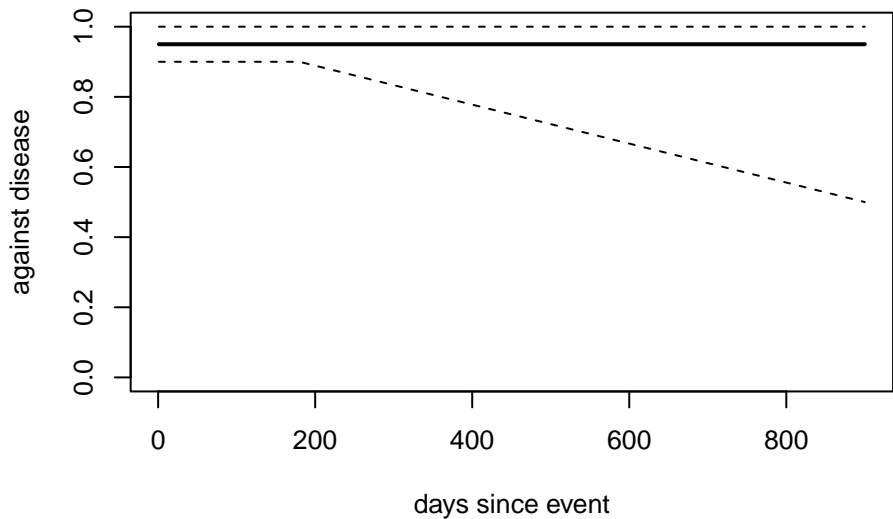

2021-01-01

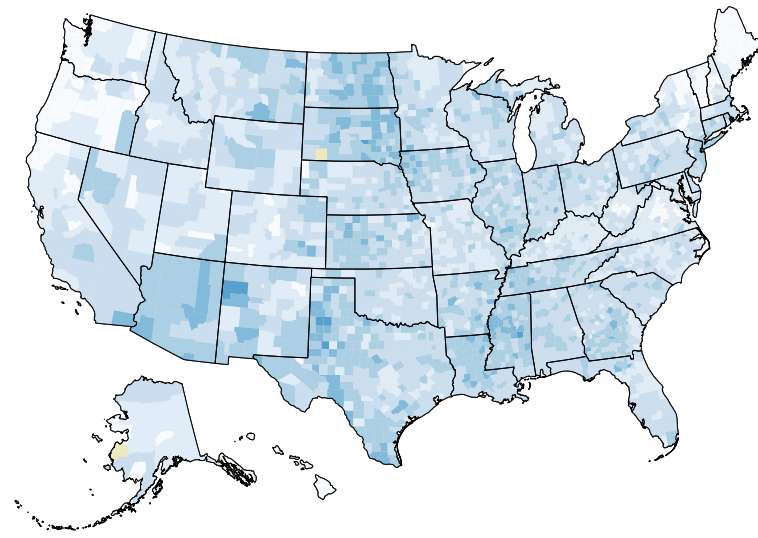

2021-05-01

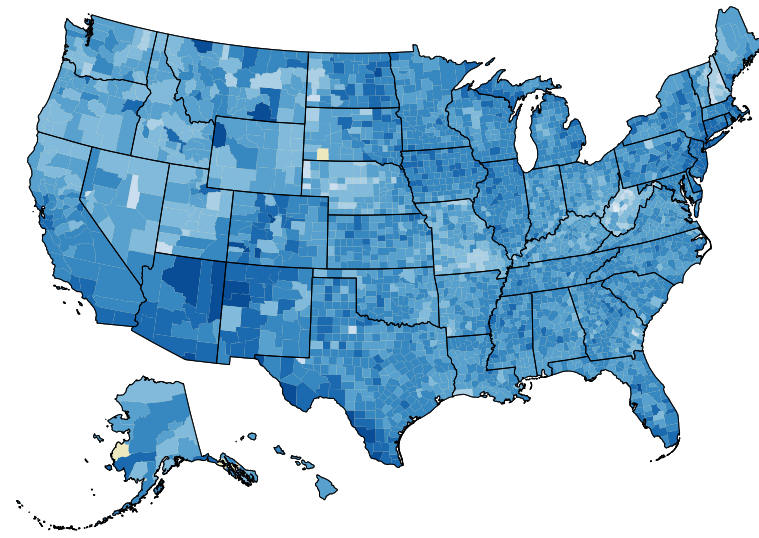

2021-09-01

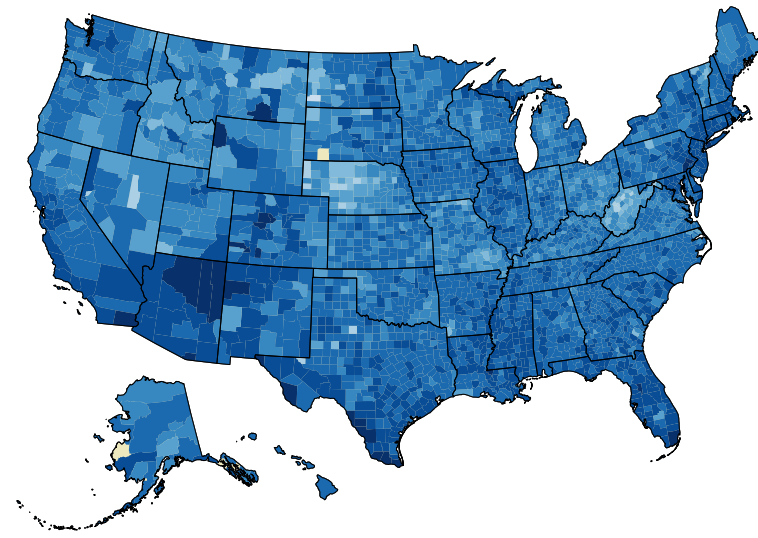

2021-12-01

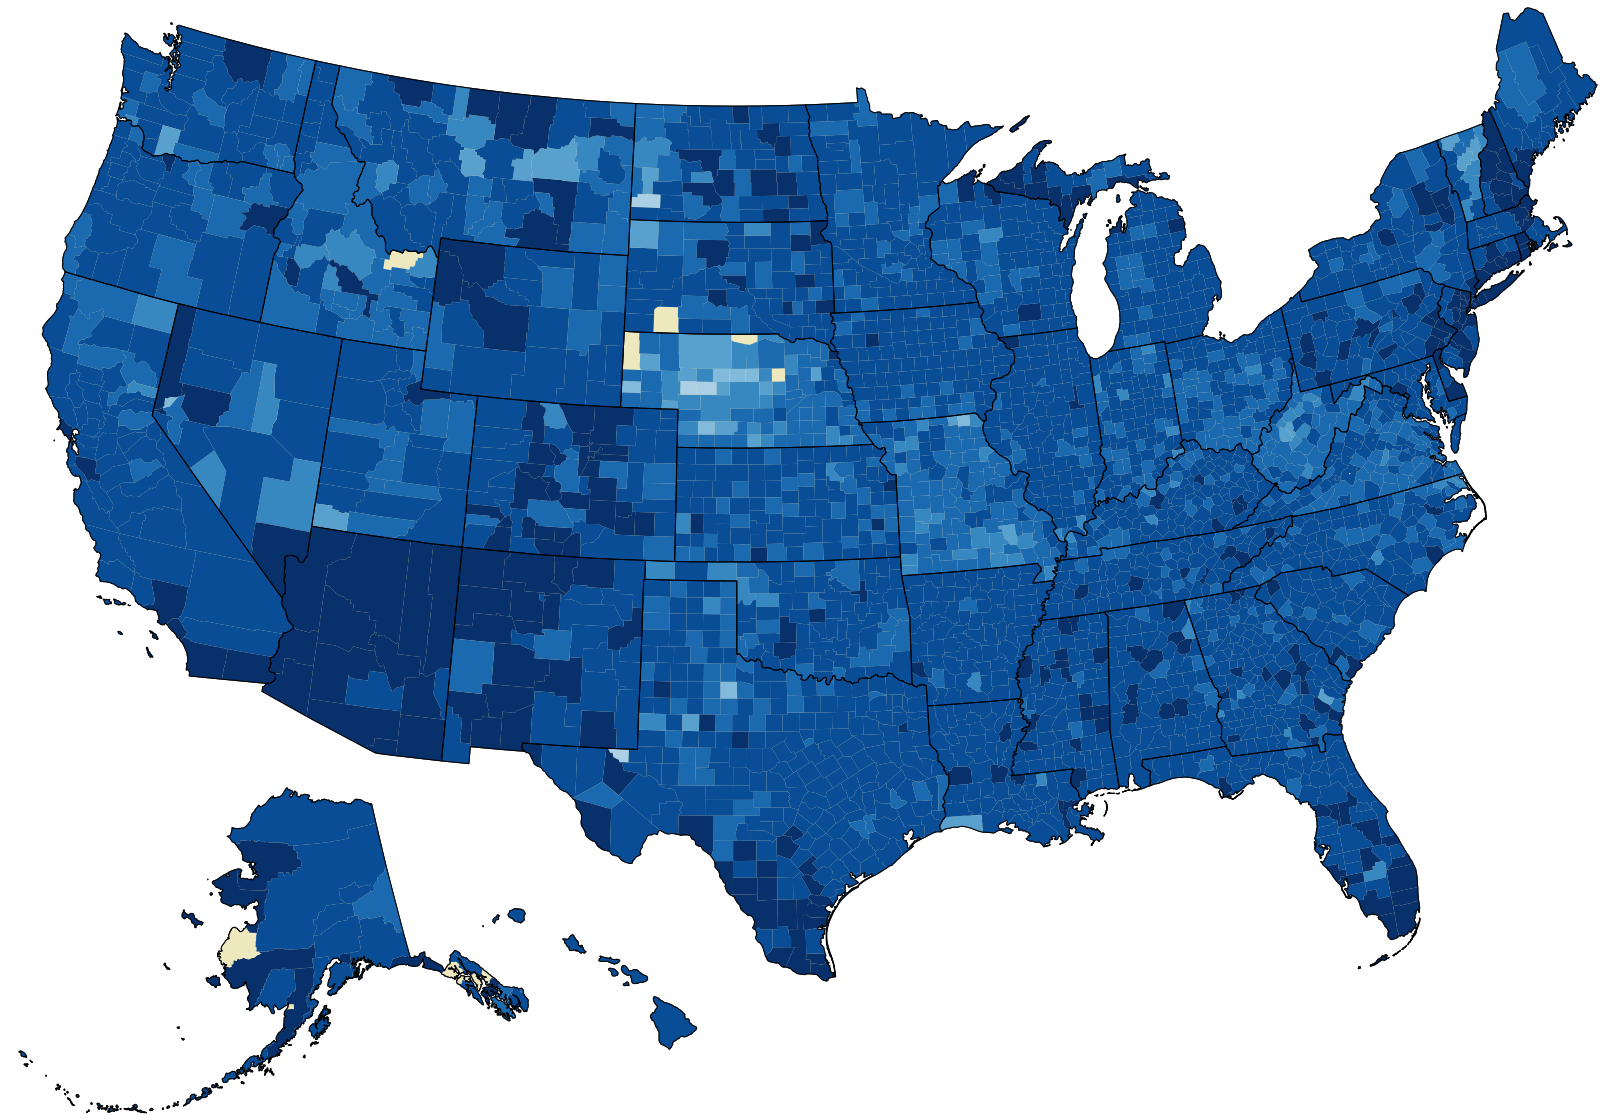

Percent ever immune-activated

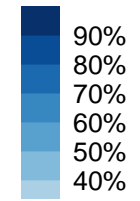

No immune escape

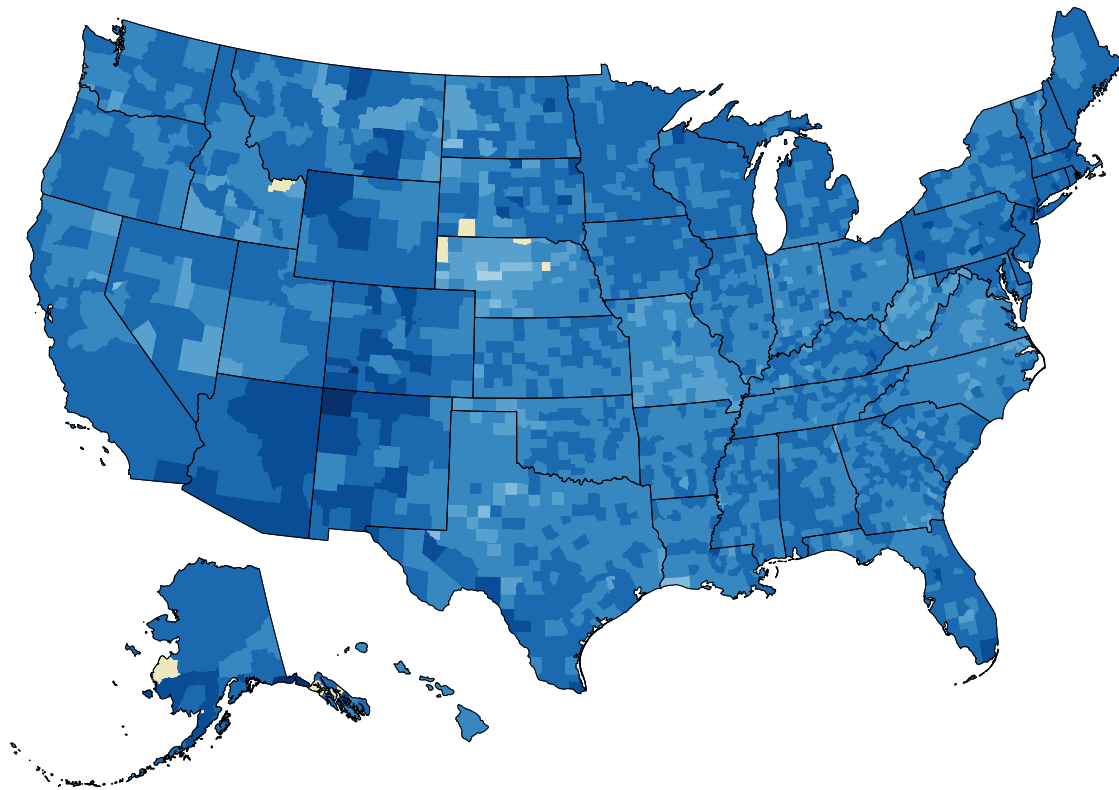

Low immune escape

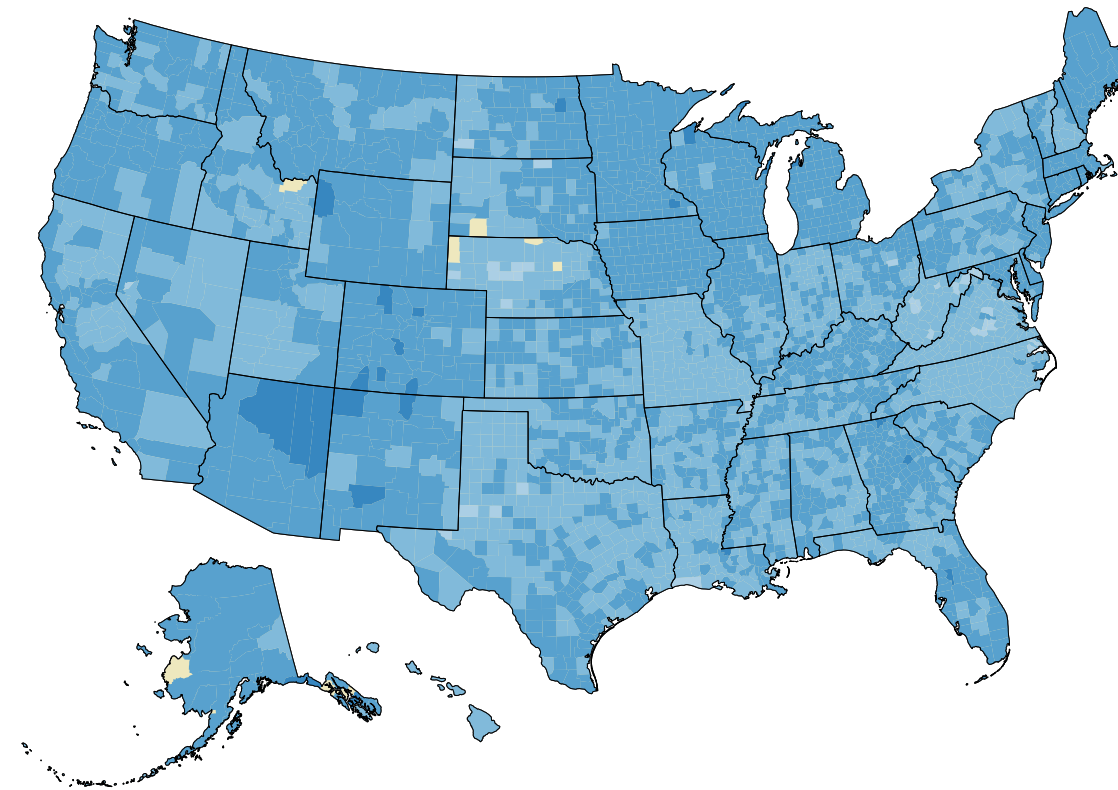

Medium immune escape

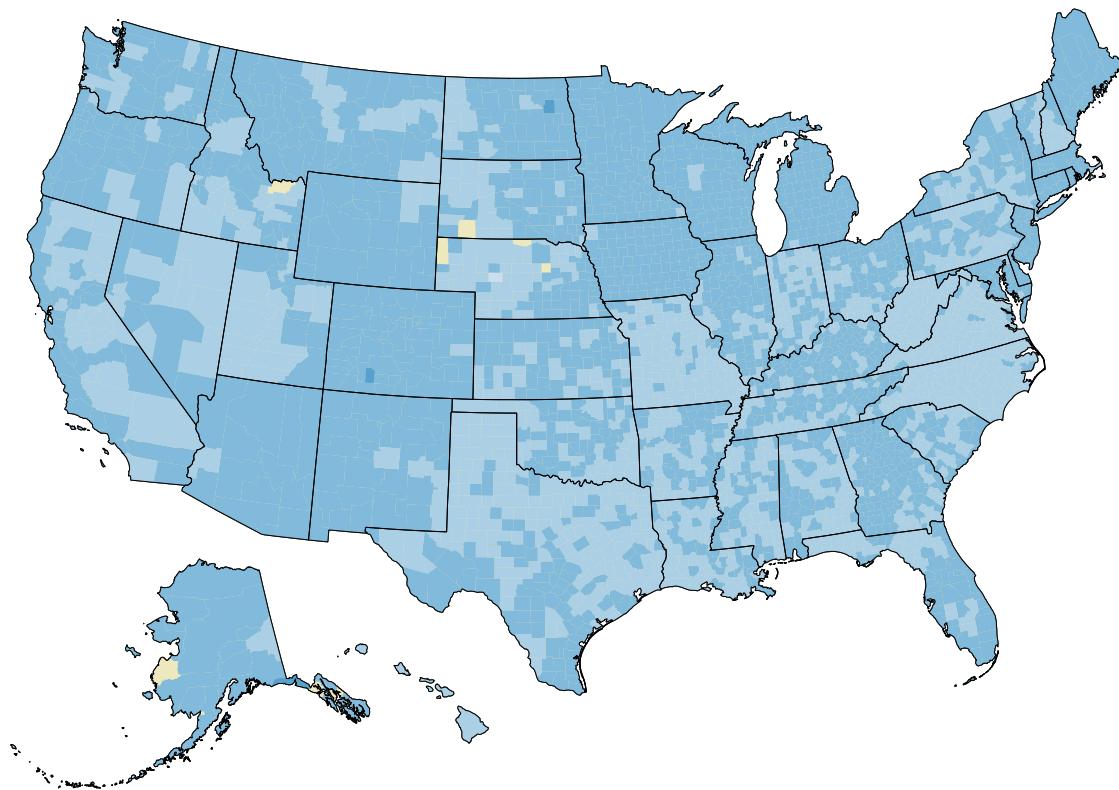

High immune escape

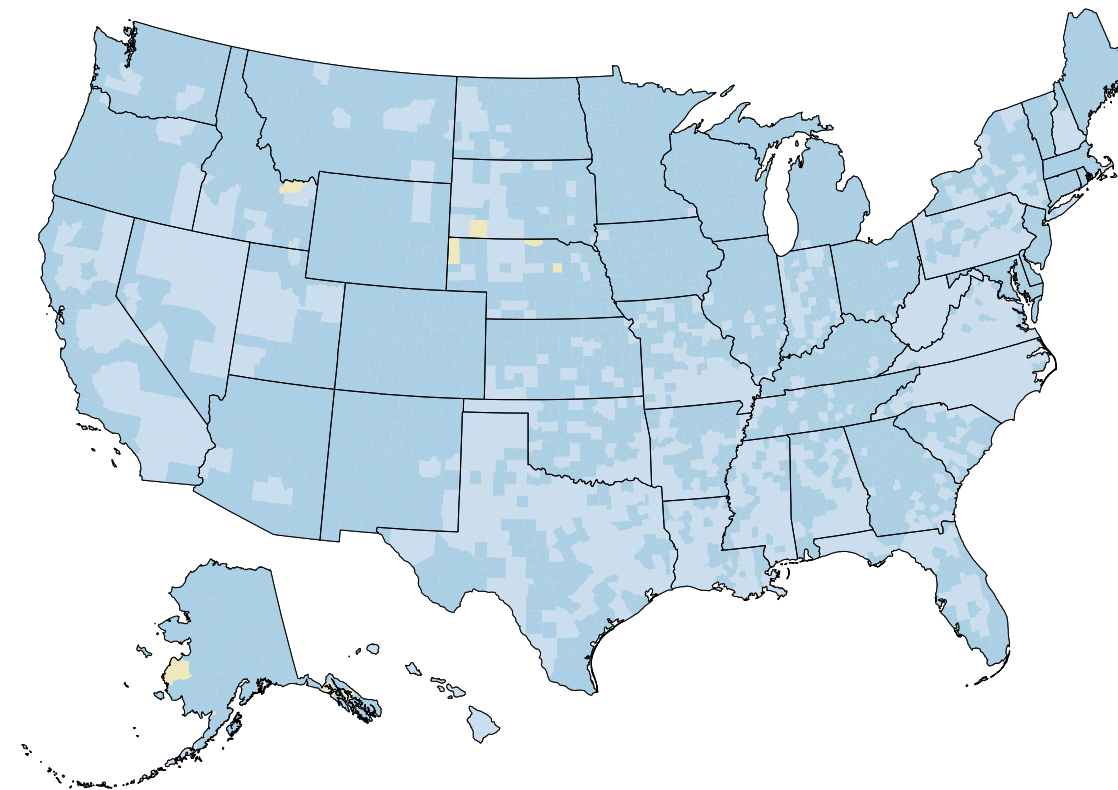

Percent effectively protected

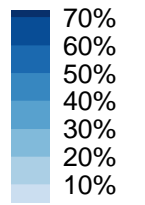

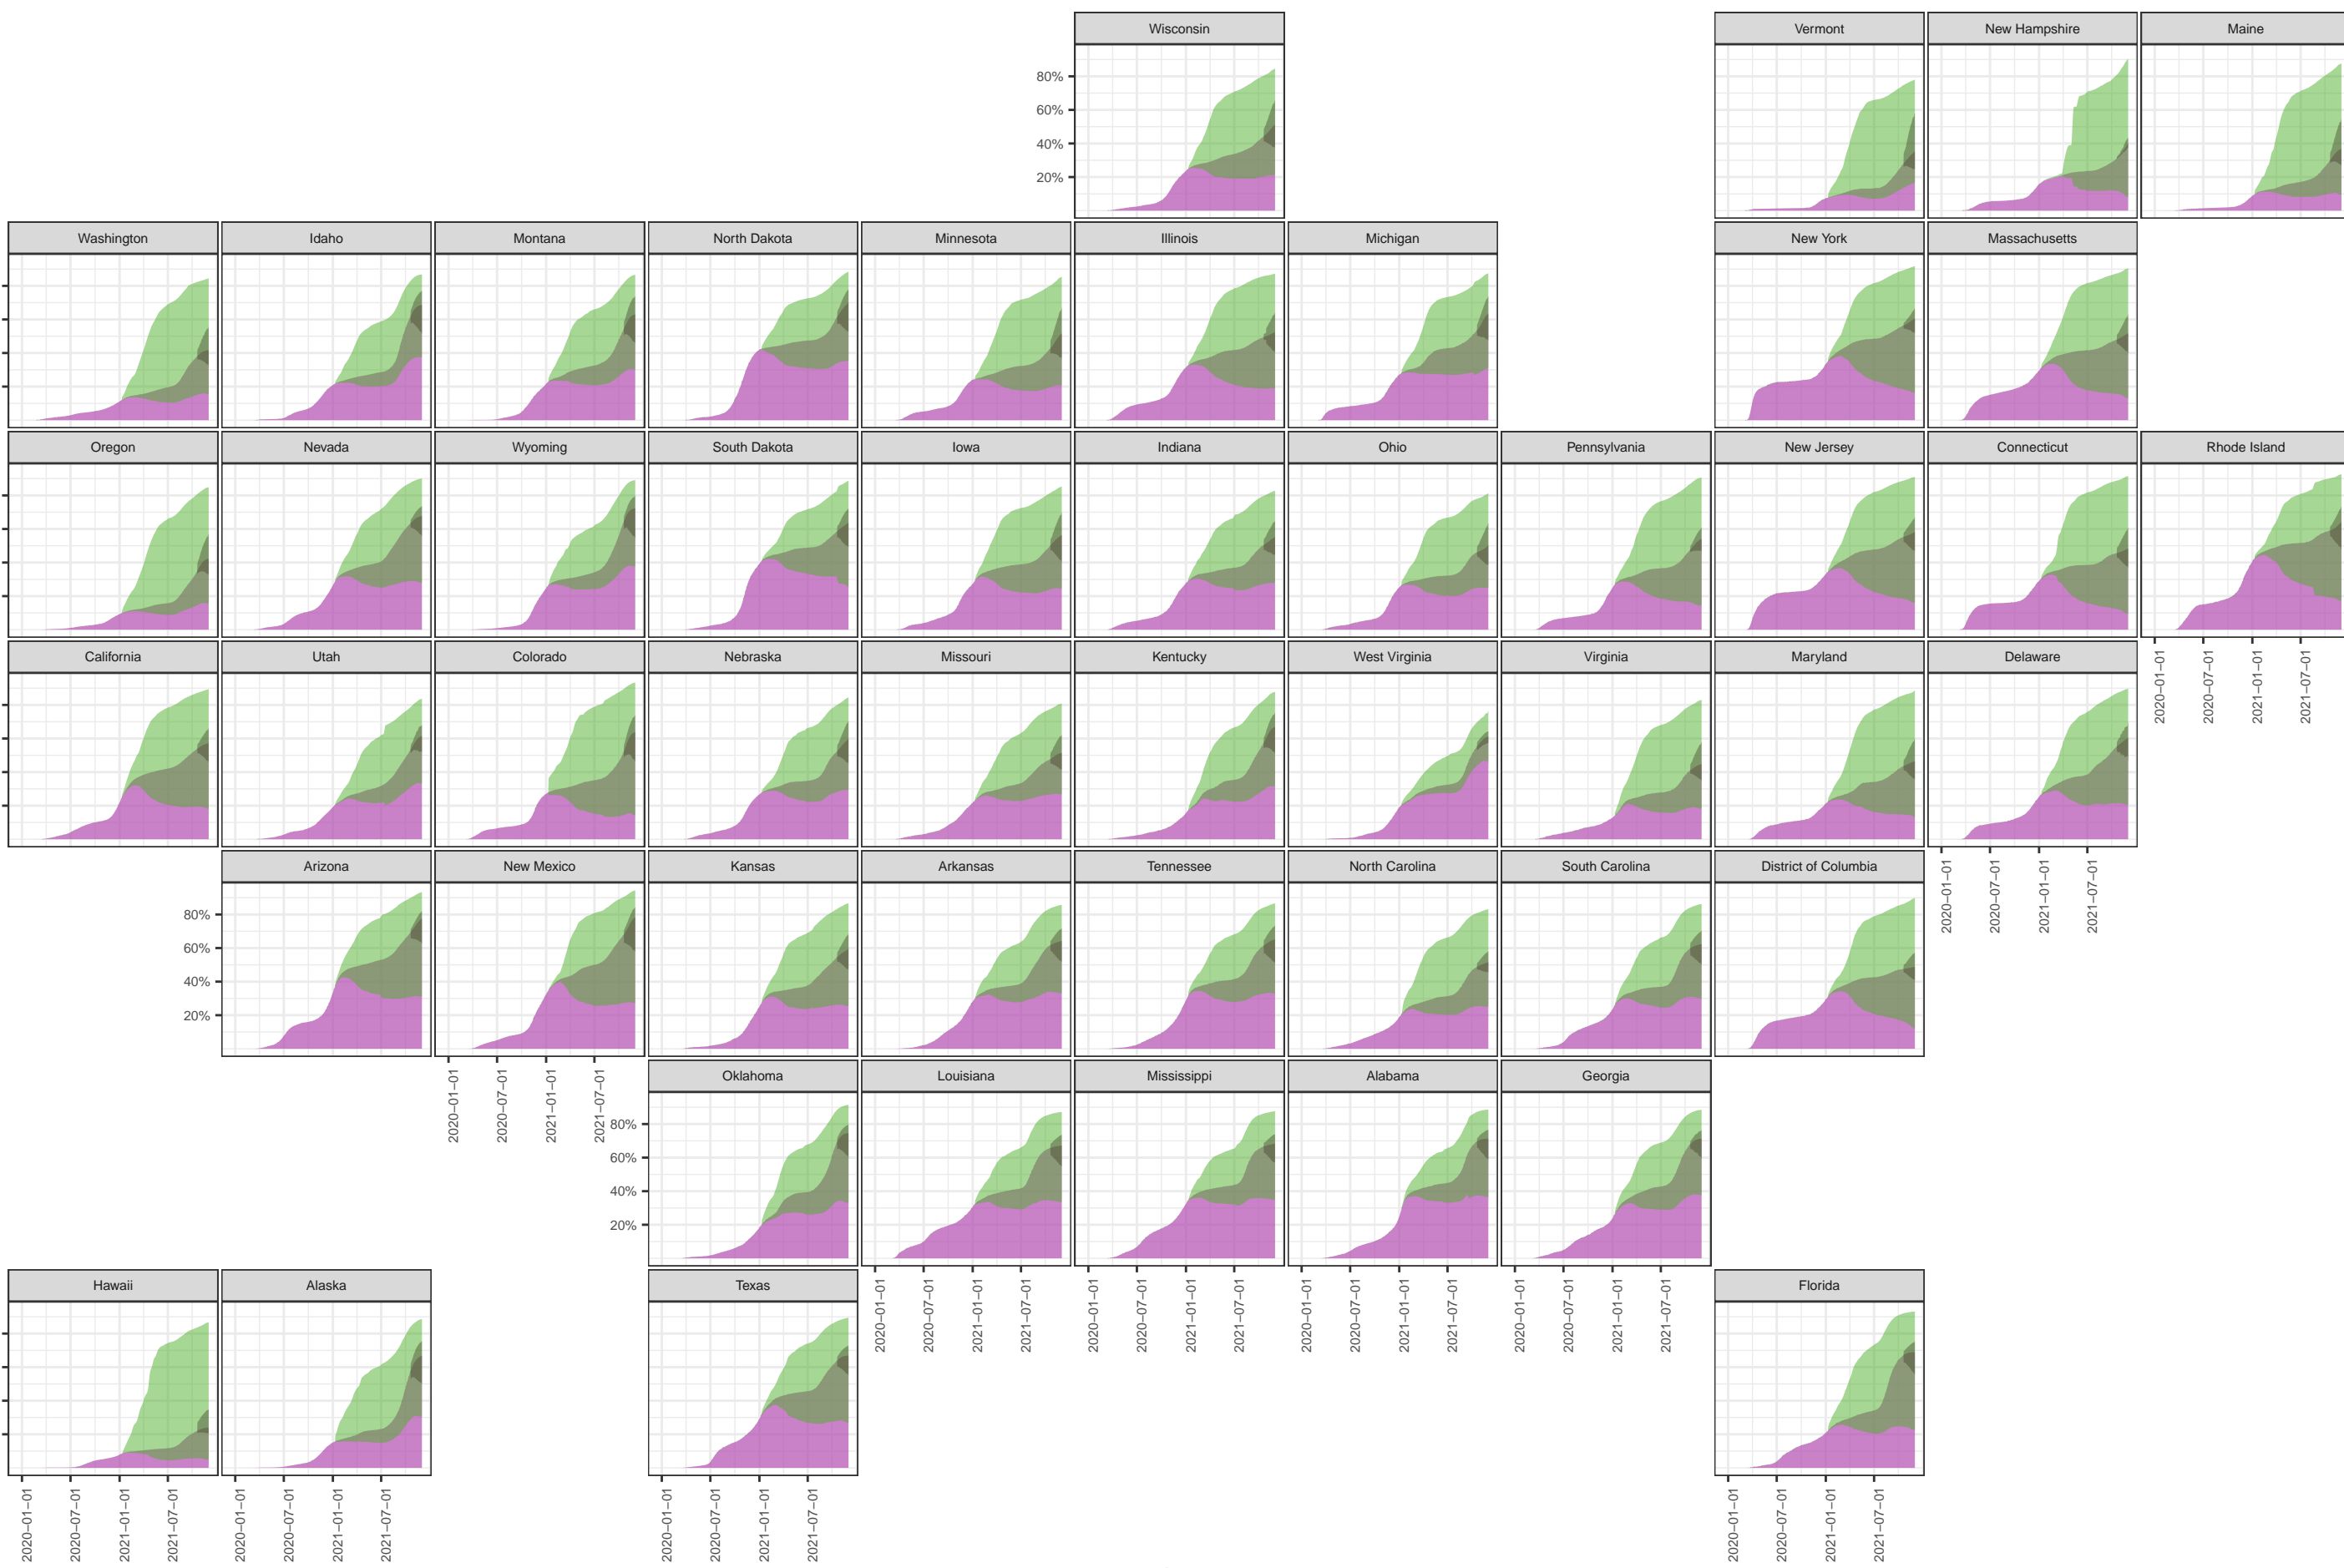

date

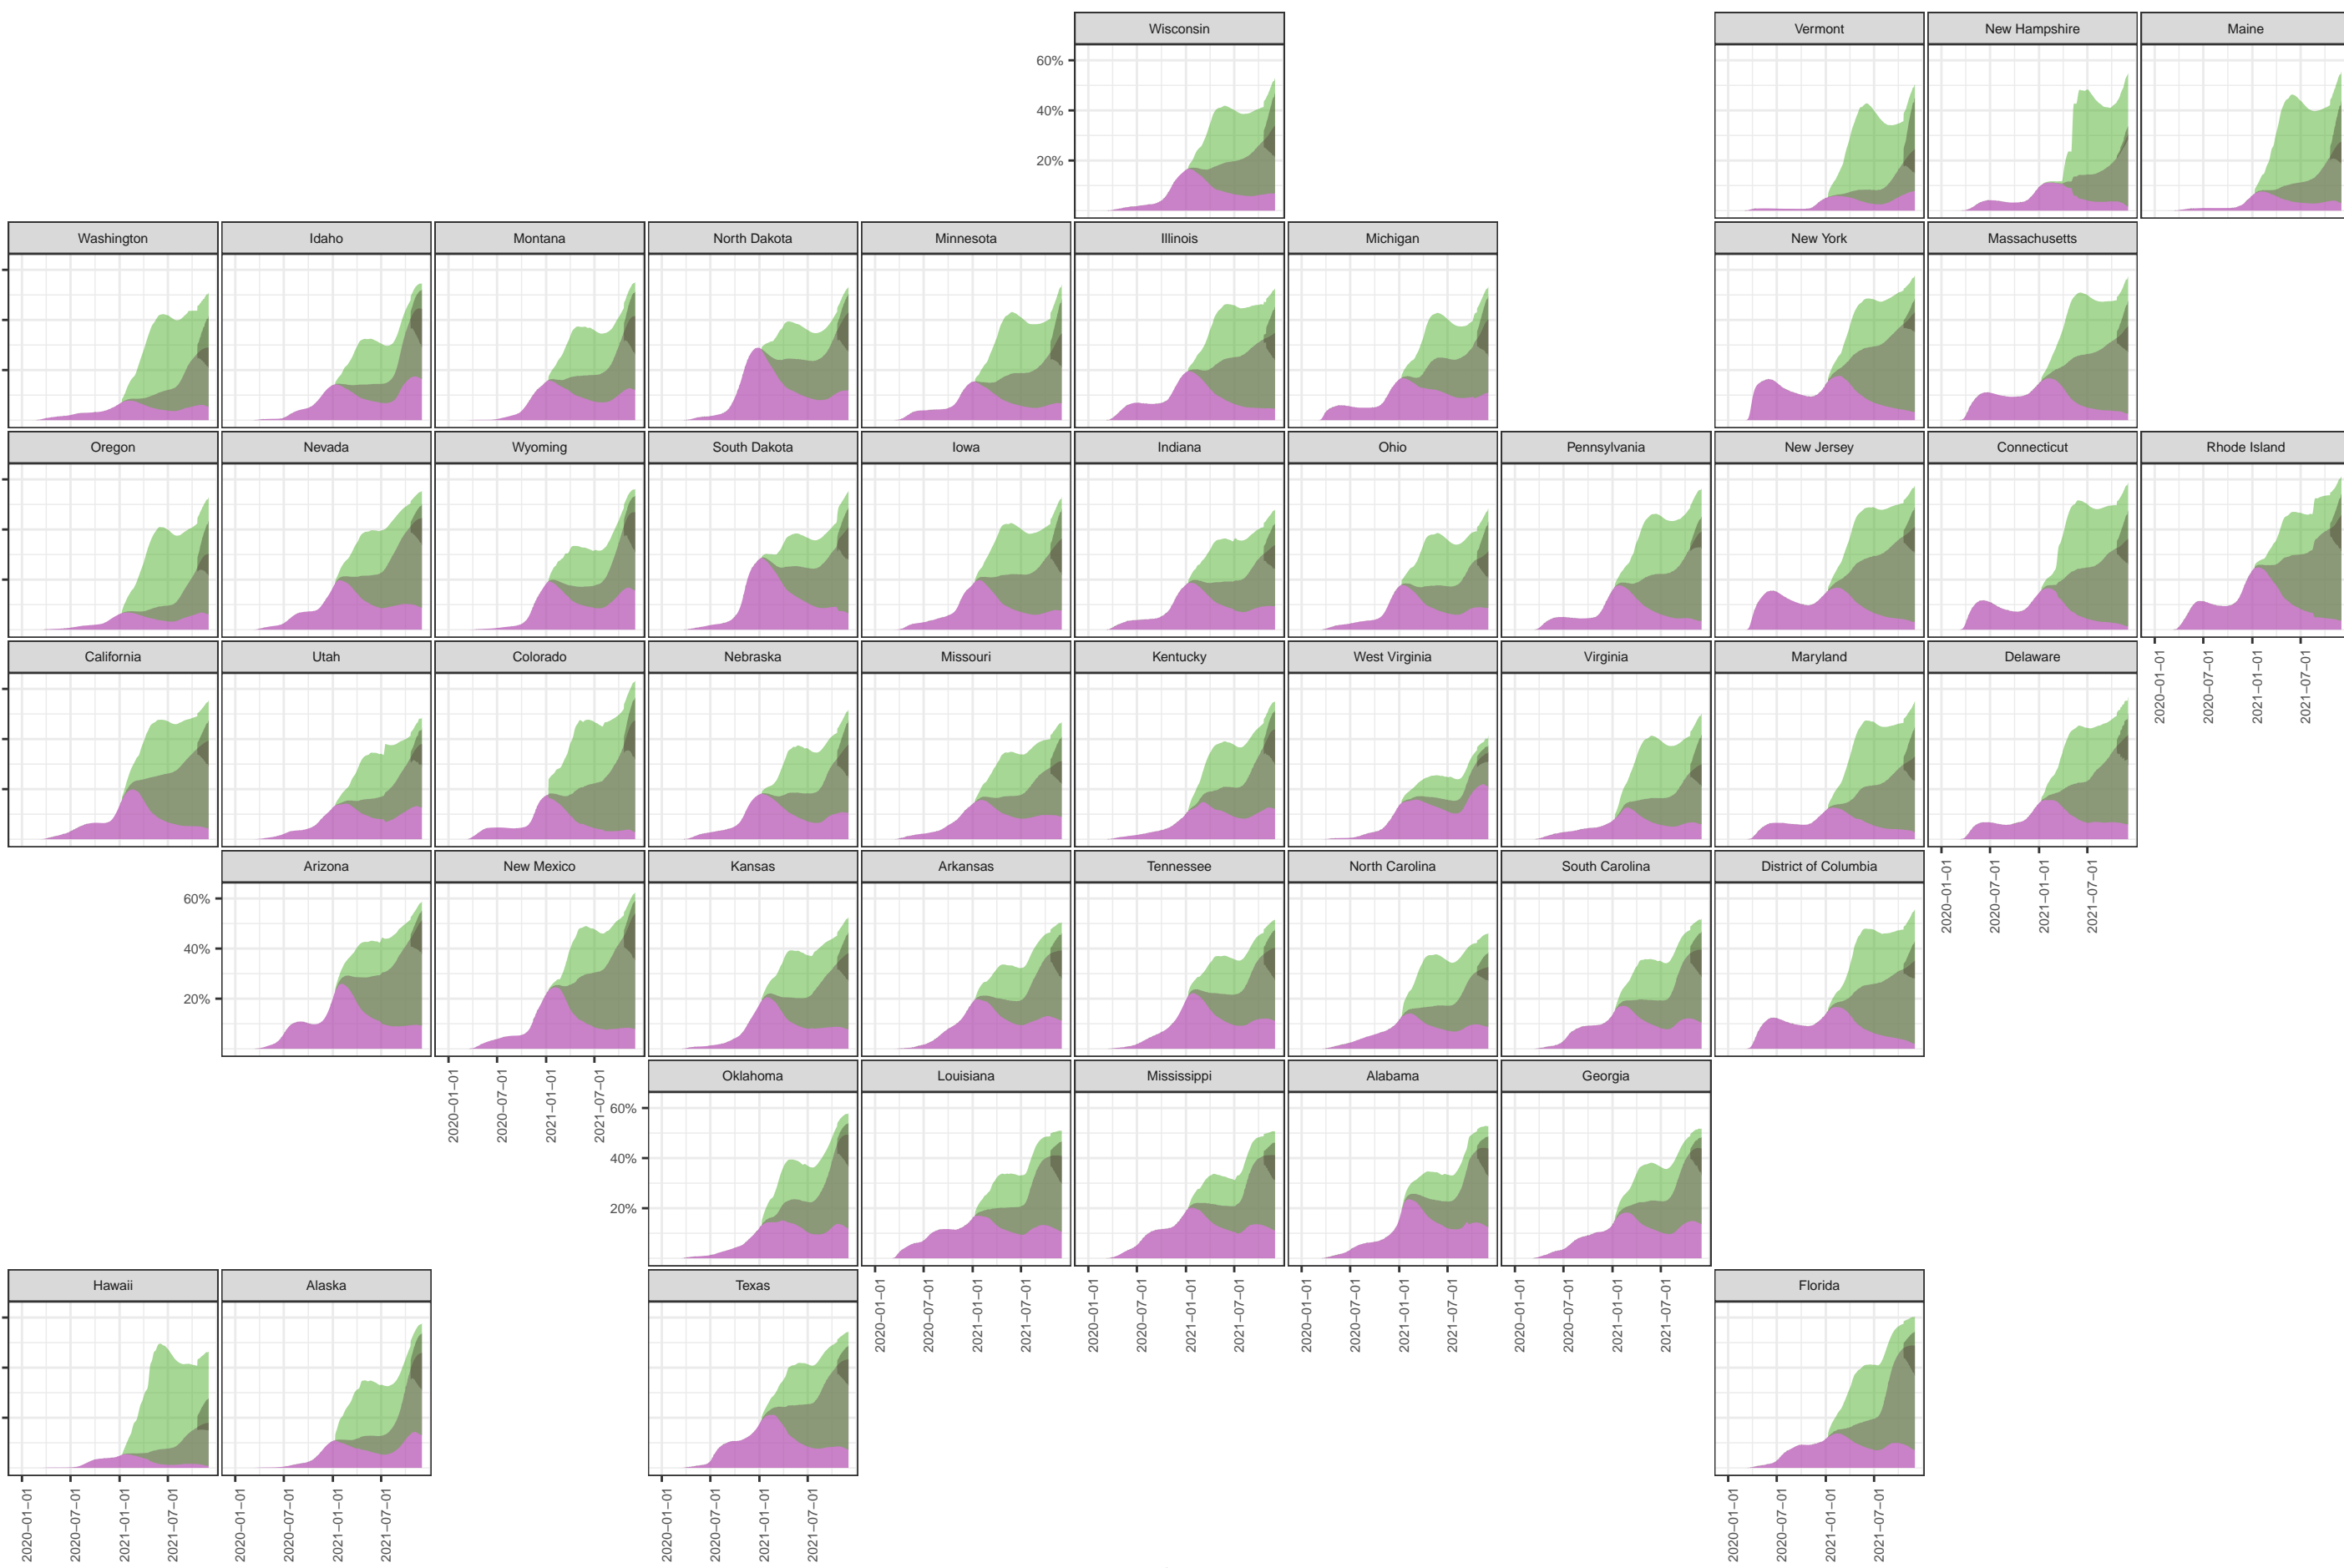

date

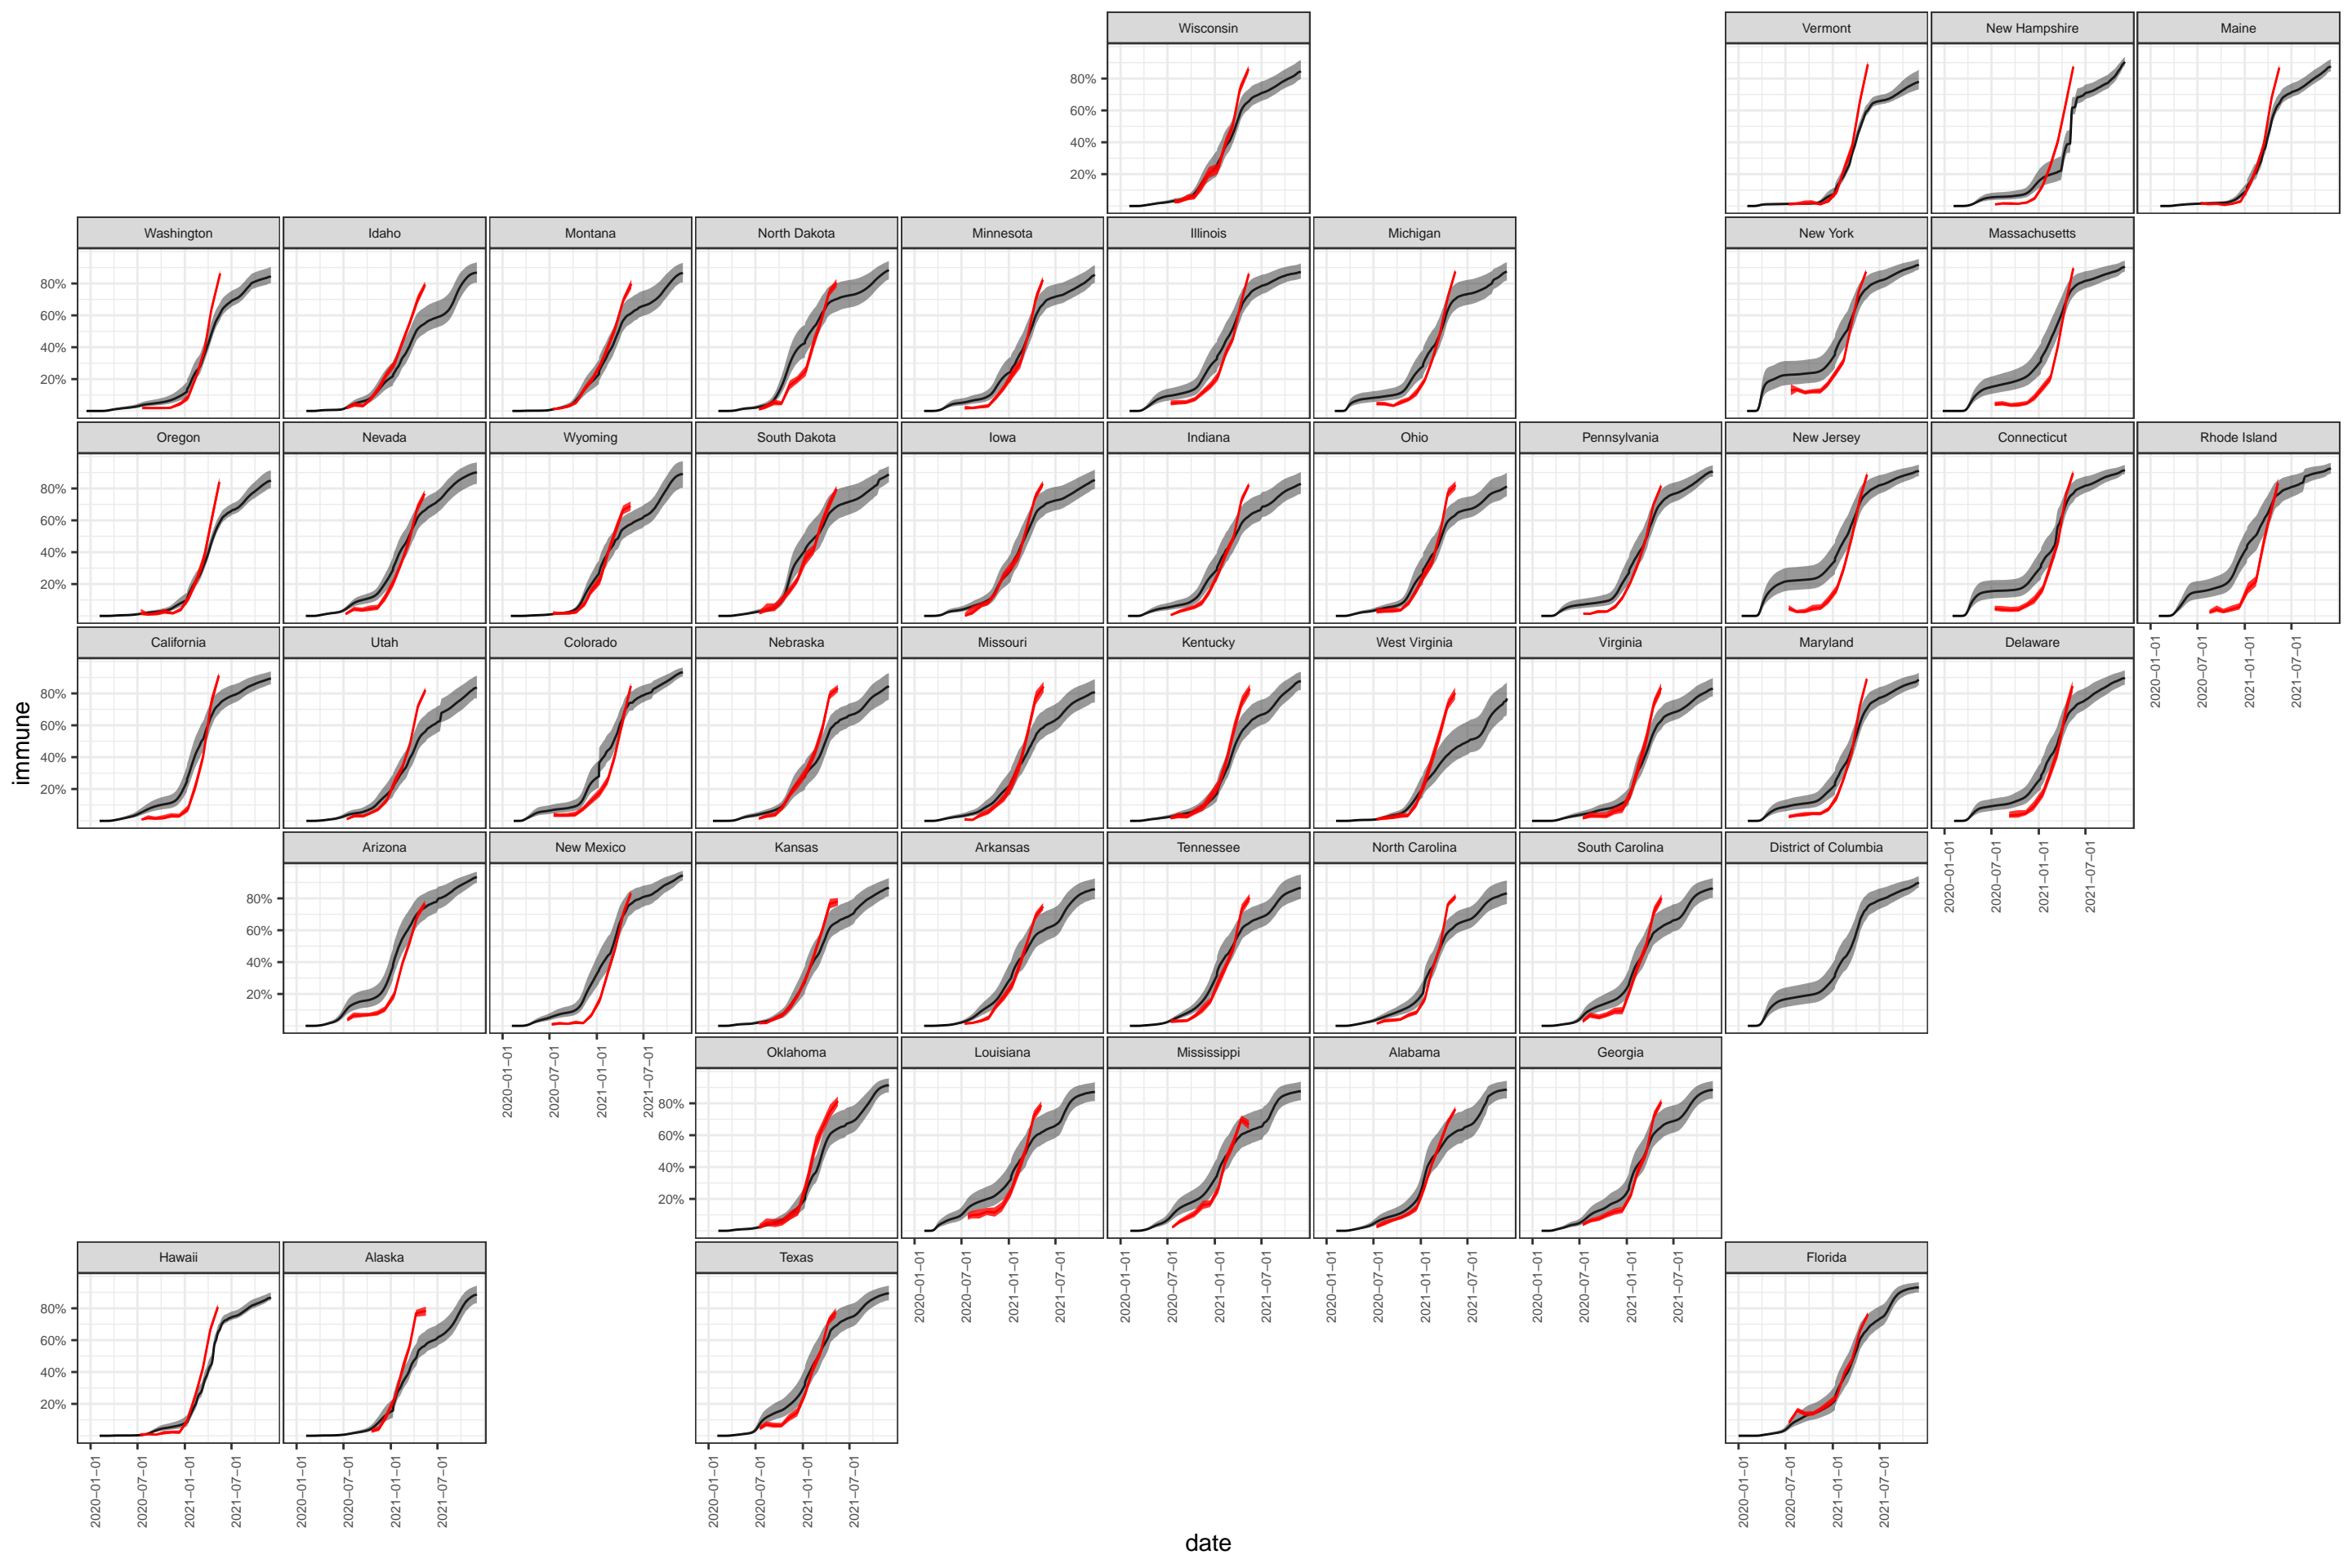

Supplement: Supplementary file [file media-2.pdf]
