# Supplementary material for: Population immunity to pre-Omicron and Omicron SARS-CoV-2 variants in US states and counties through December 1, 2021
Source: bioRxiv or medRxiv preprint supplement (doi:10.1101/2021.12.23.21268272), 2022-03-01

**Protection from infection or vaccination**

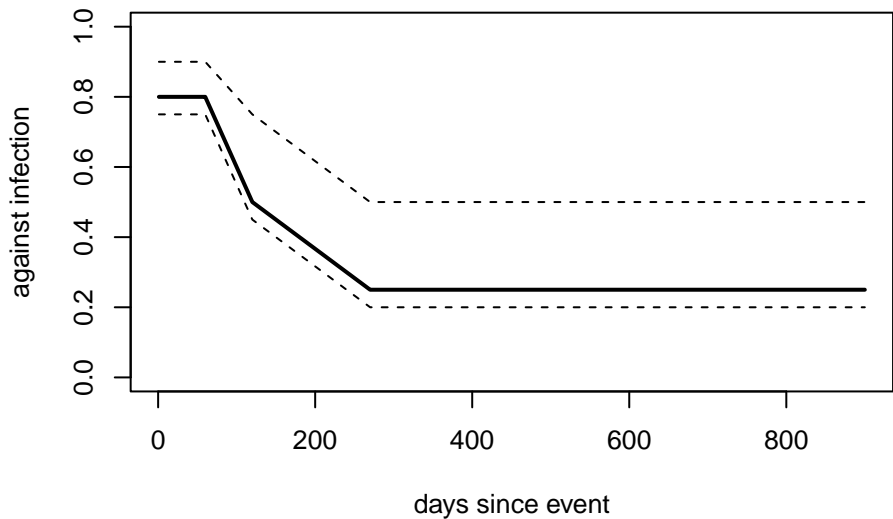

**Protection from infection and vaccination**

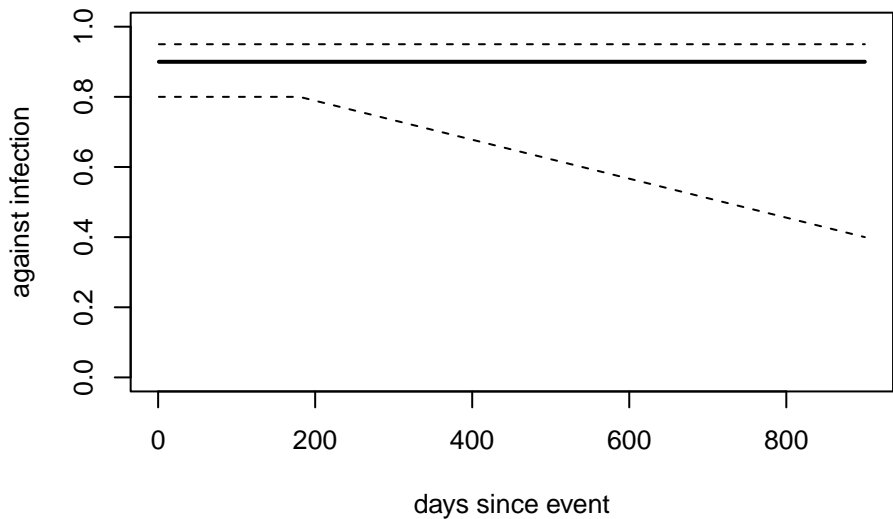

**Protection from infection or vaccination**

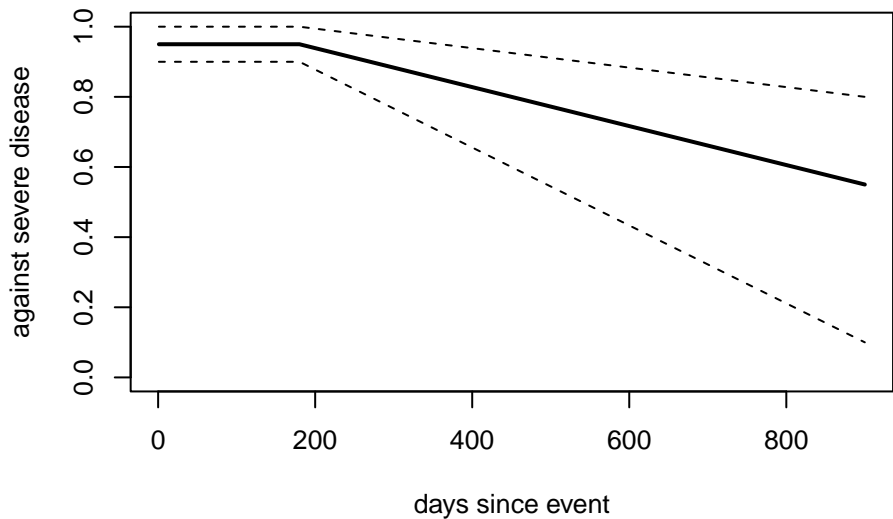

**Protection from infection and vaccination**

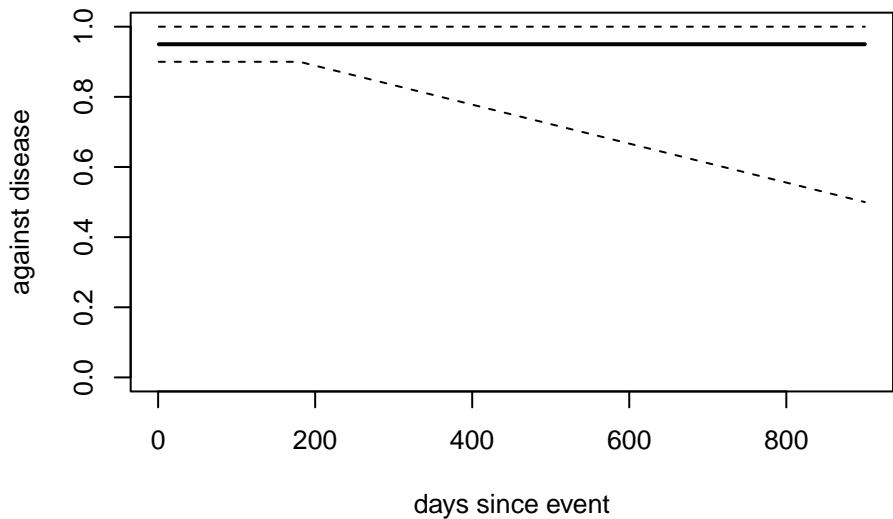

2021-01-31

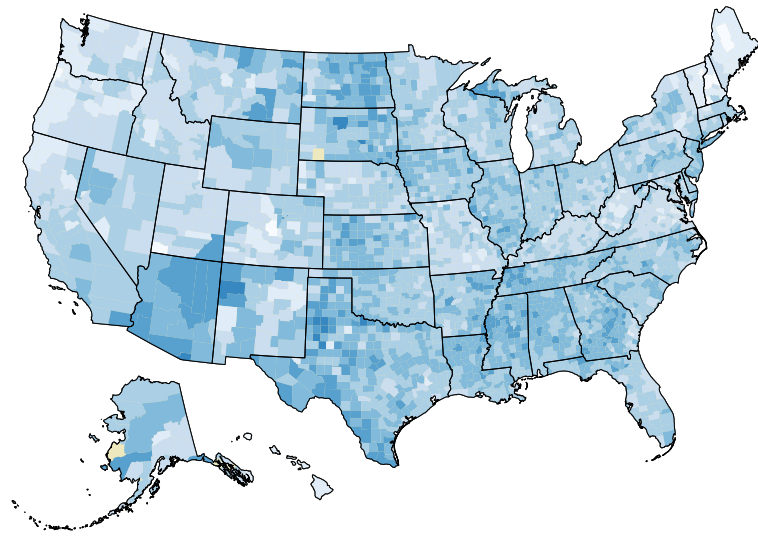

2021-04-30

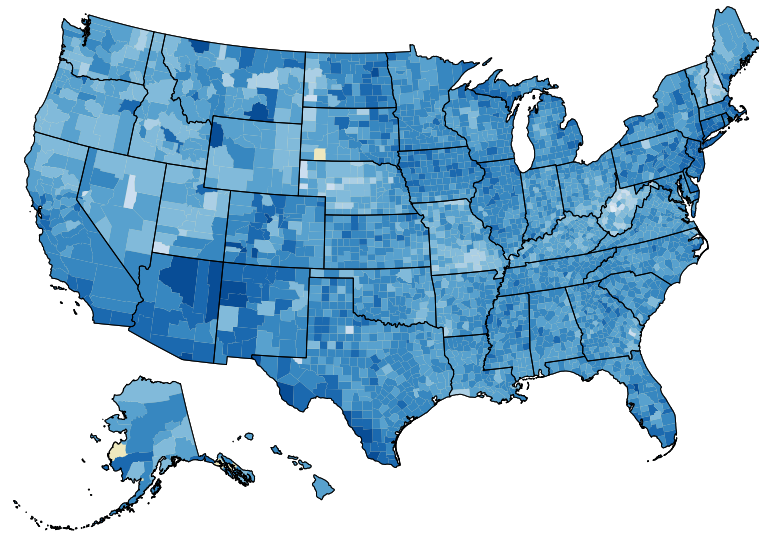

2021-07-31

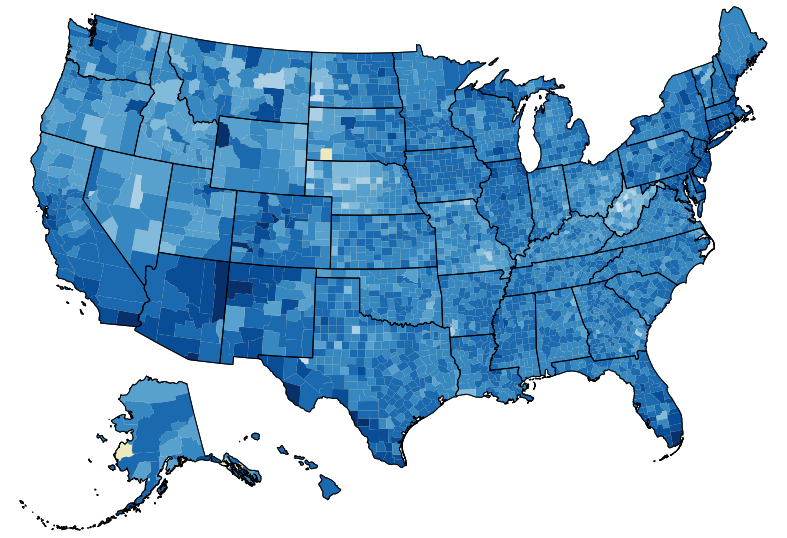

2021-10-31

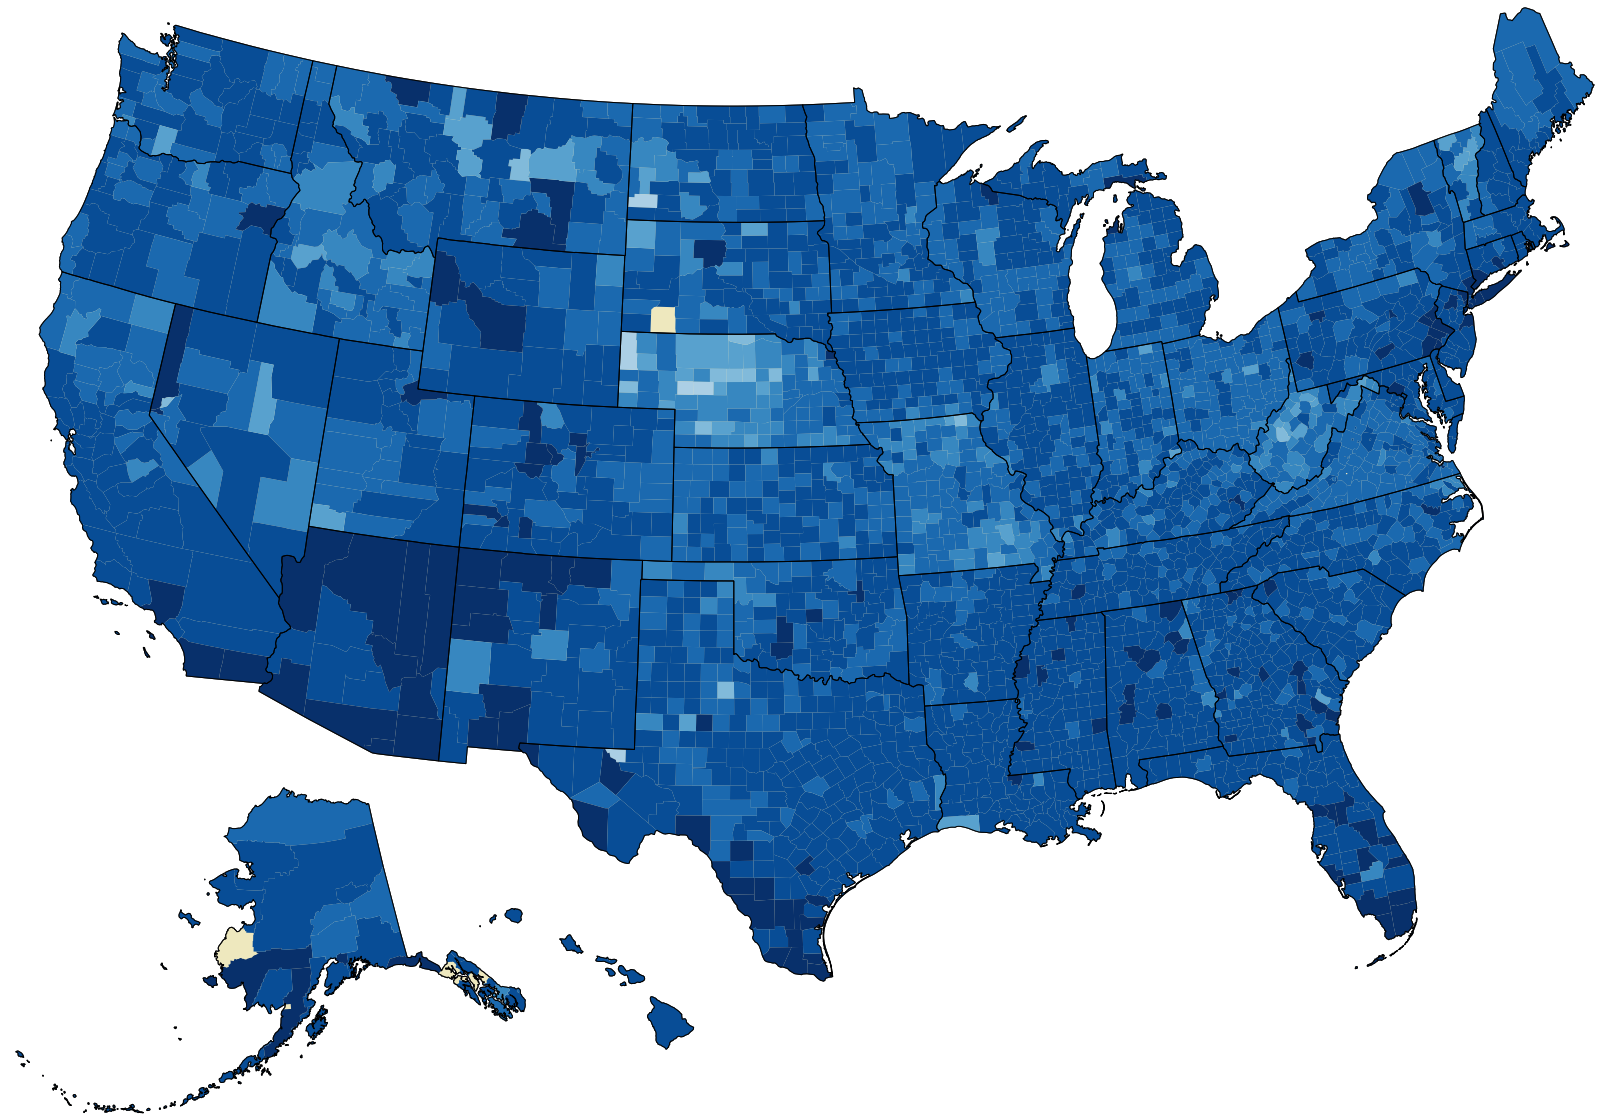

Percent ever  
immune-activated

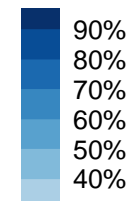

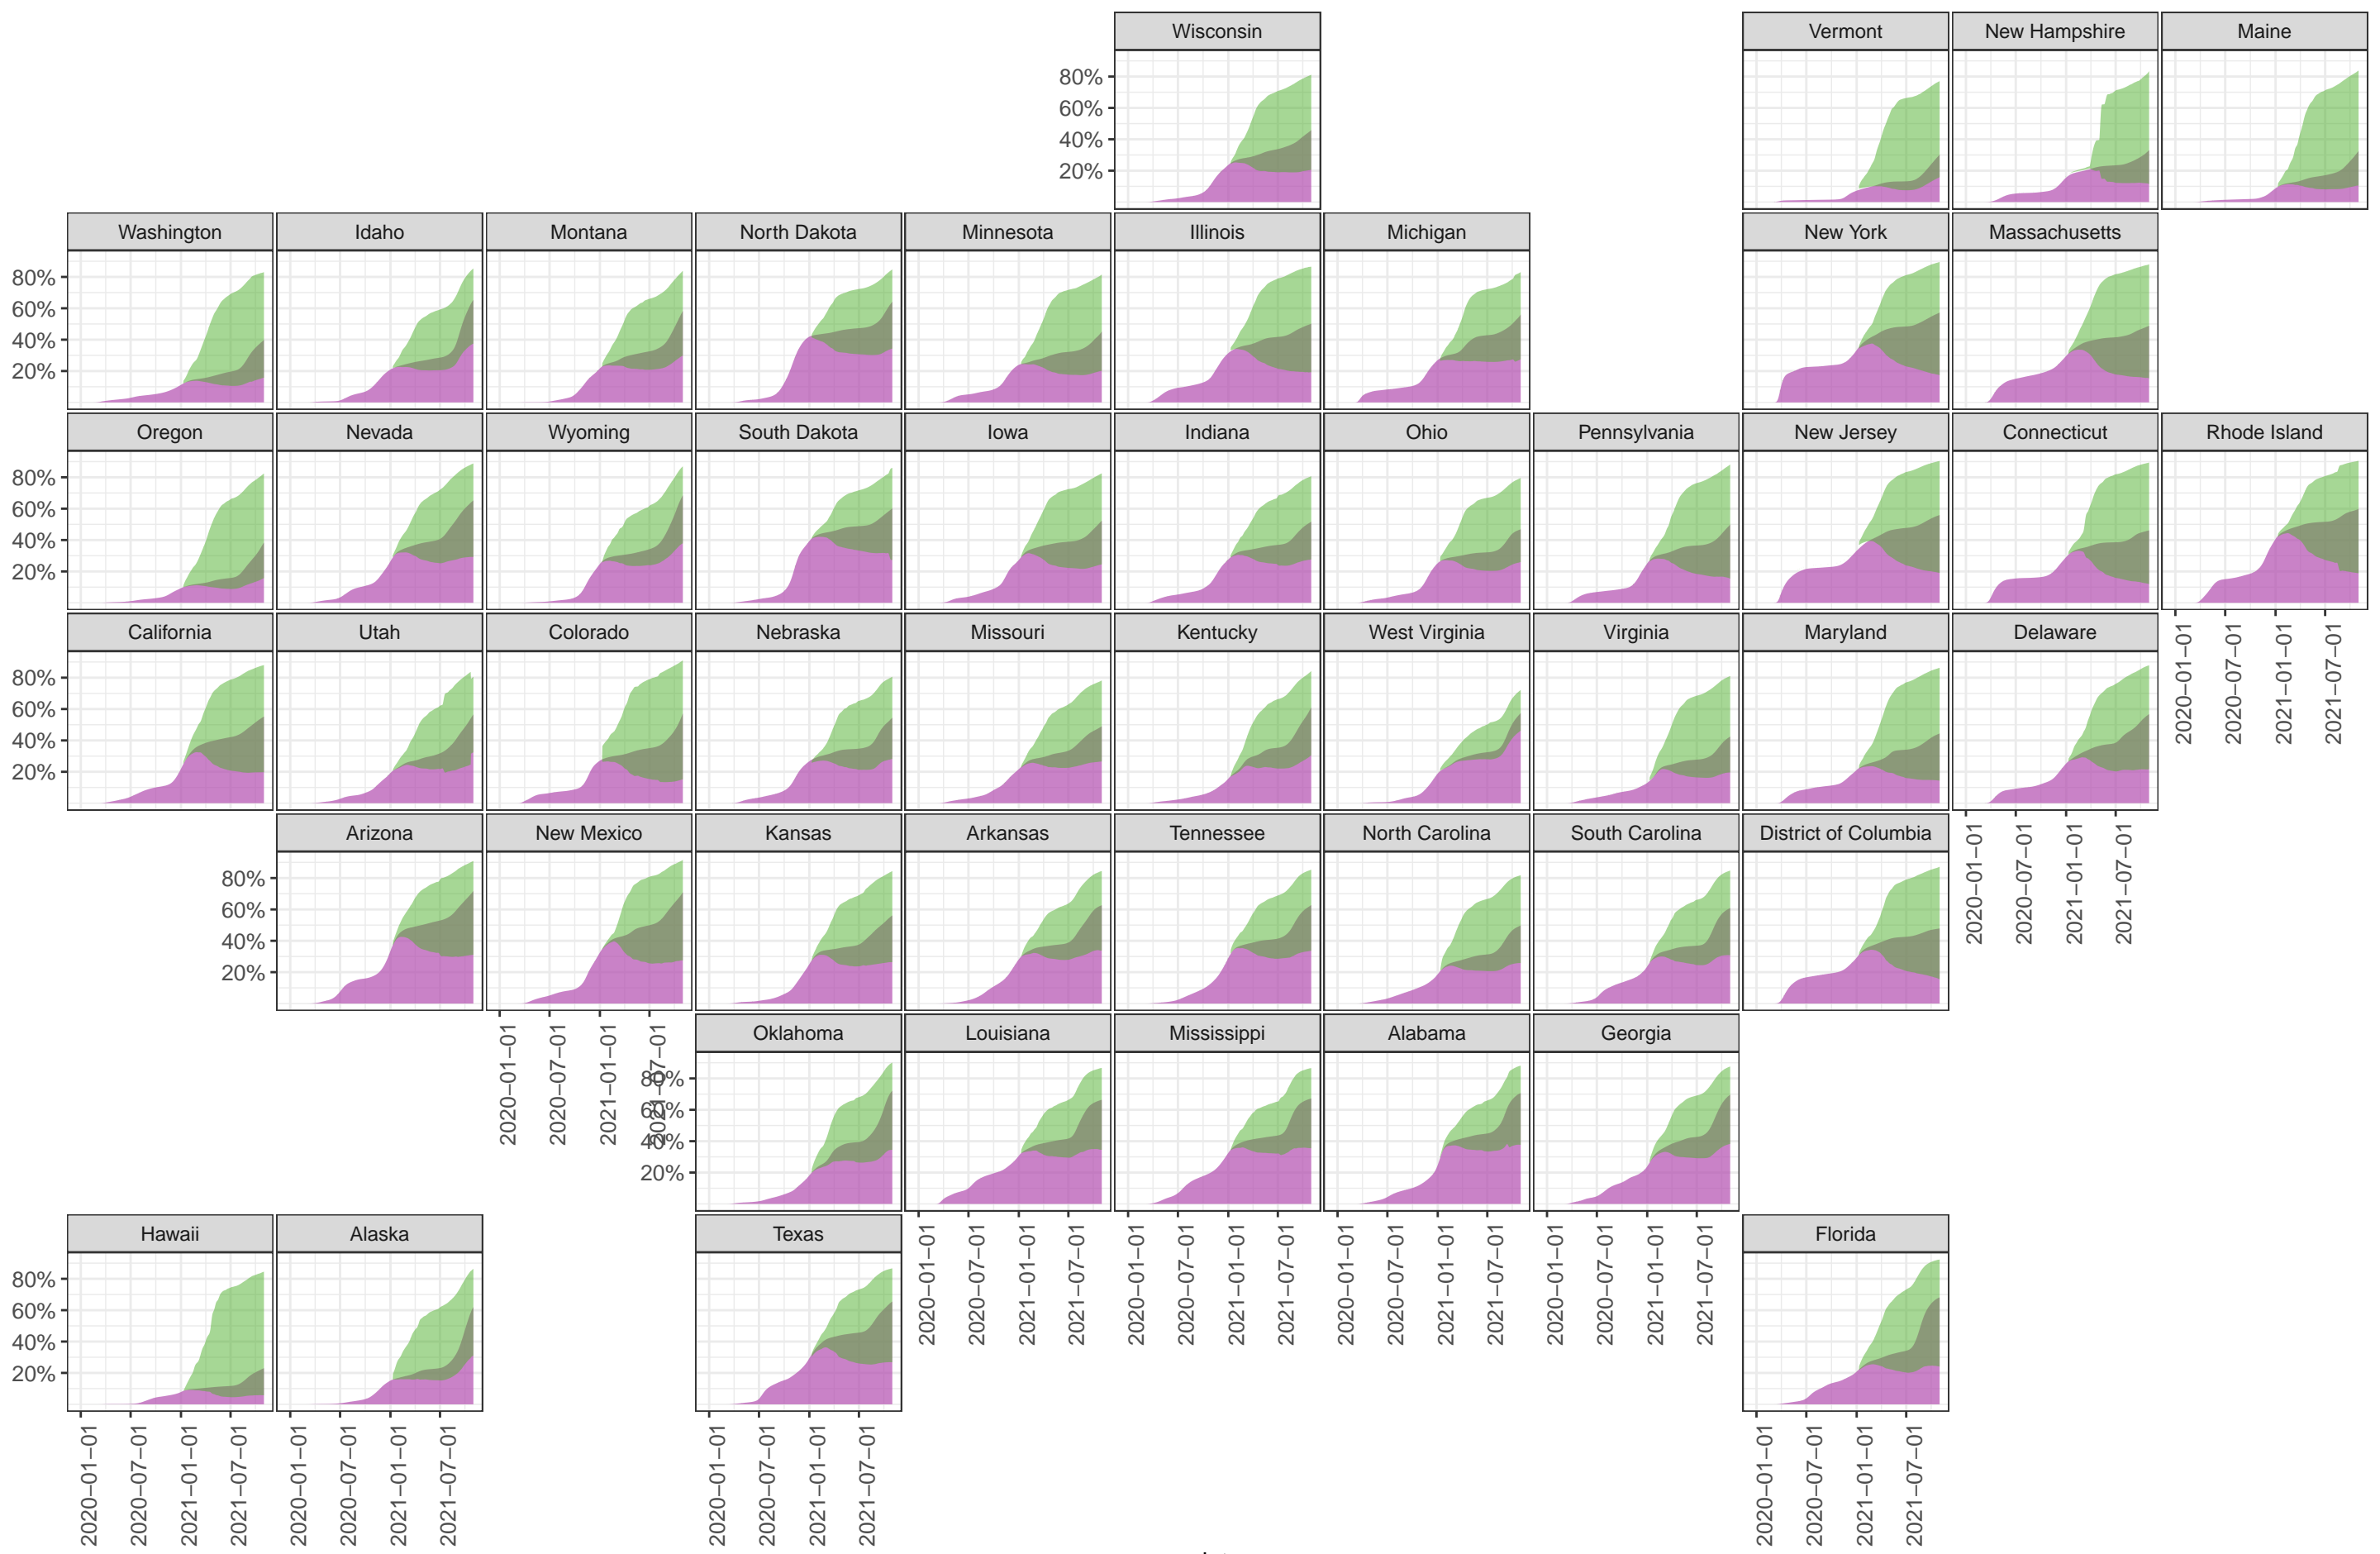

date

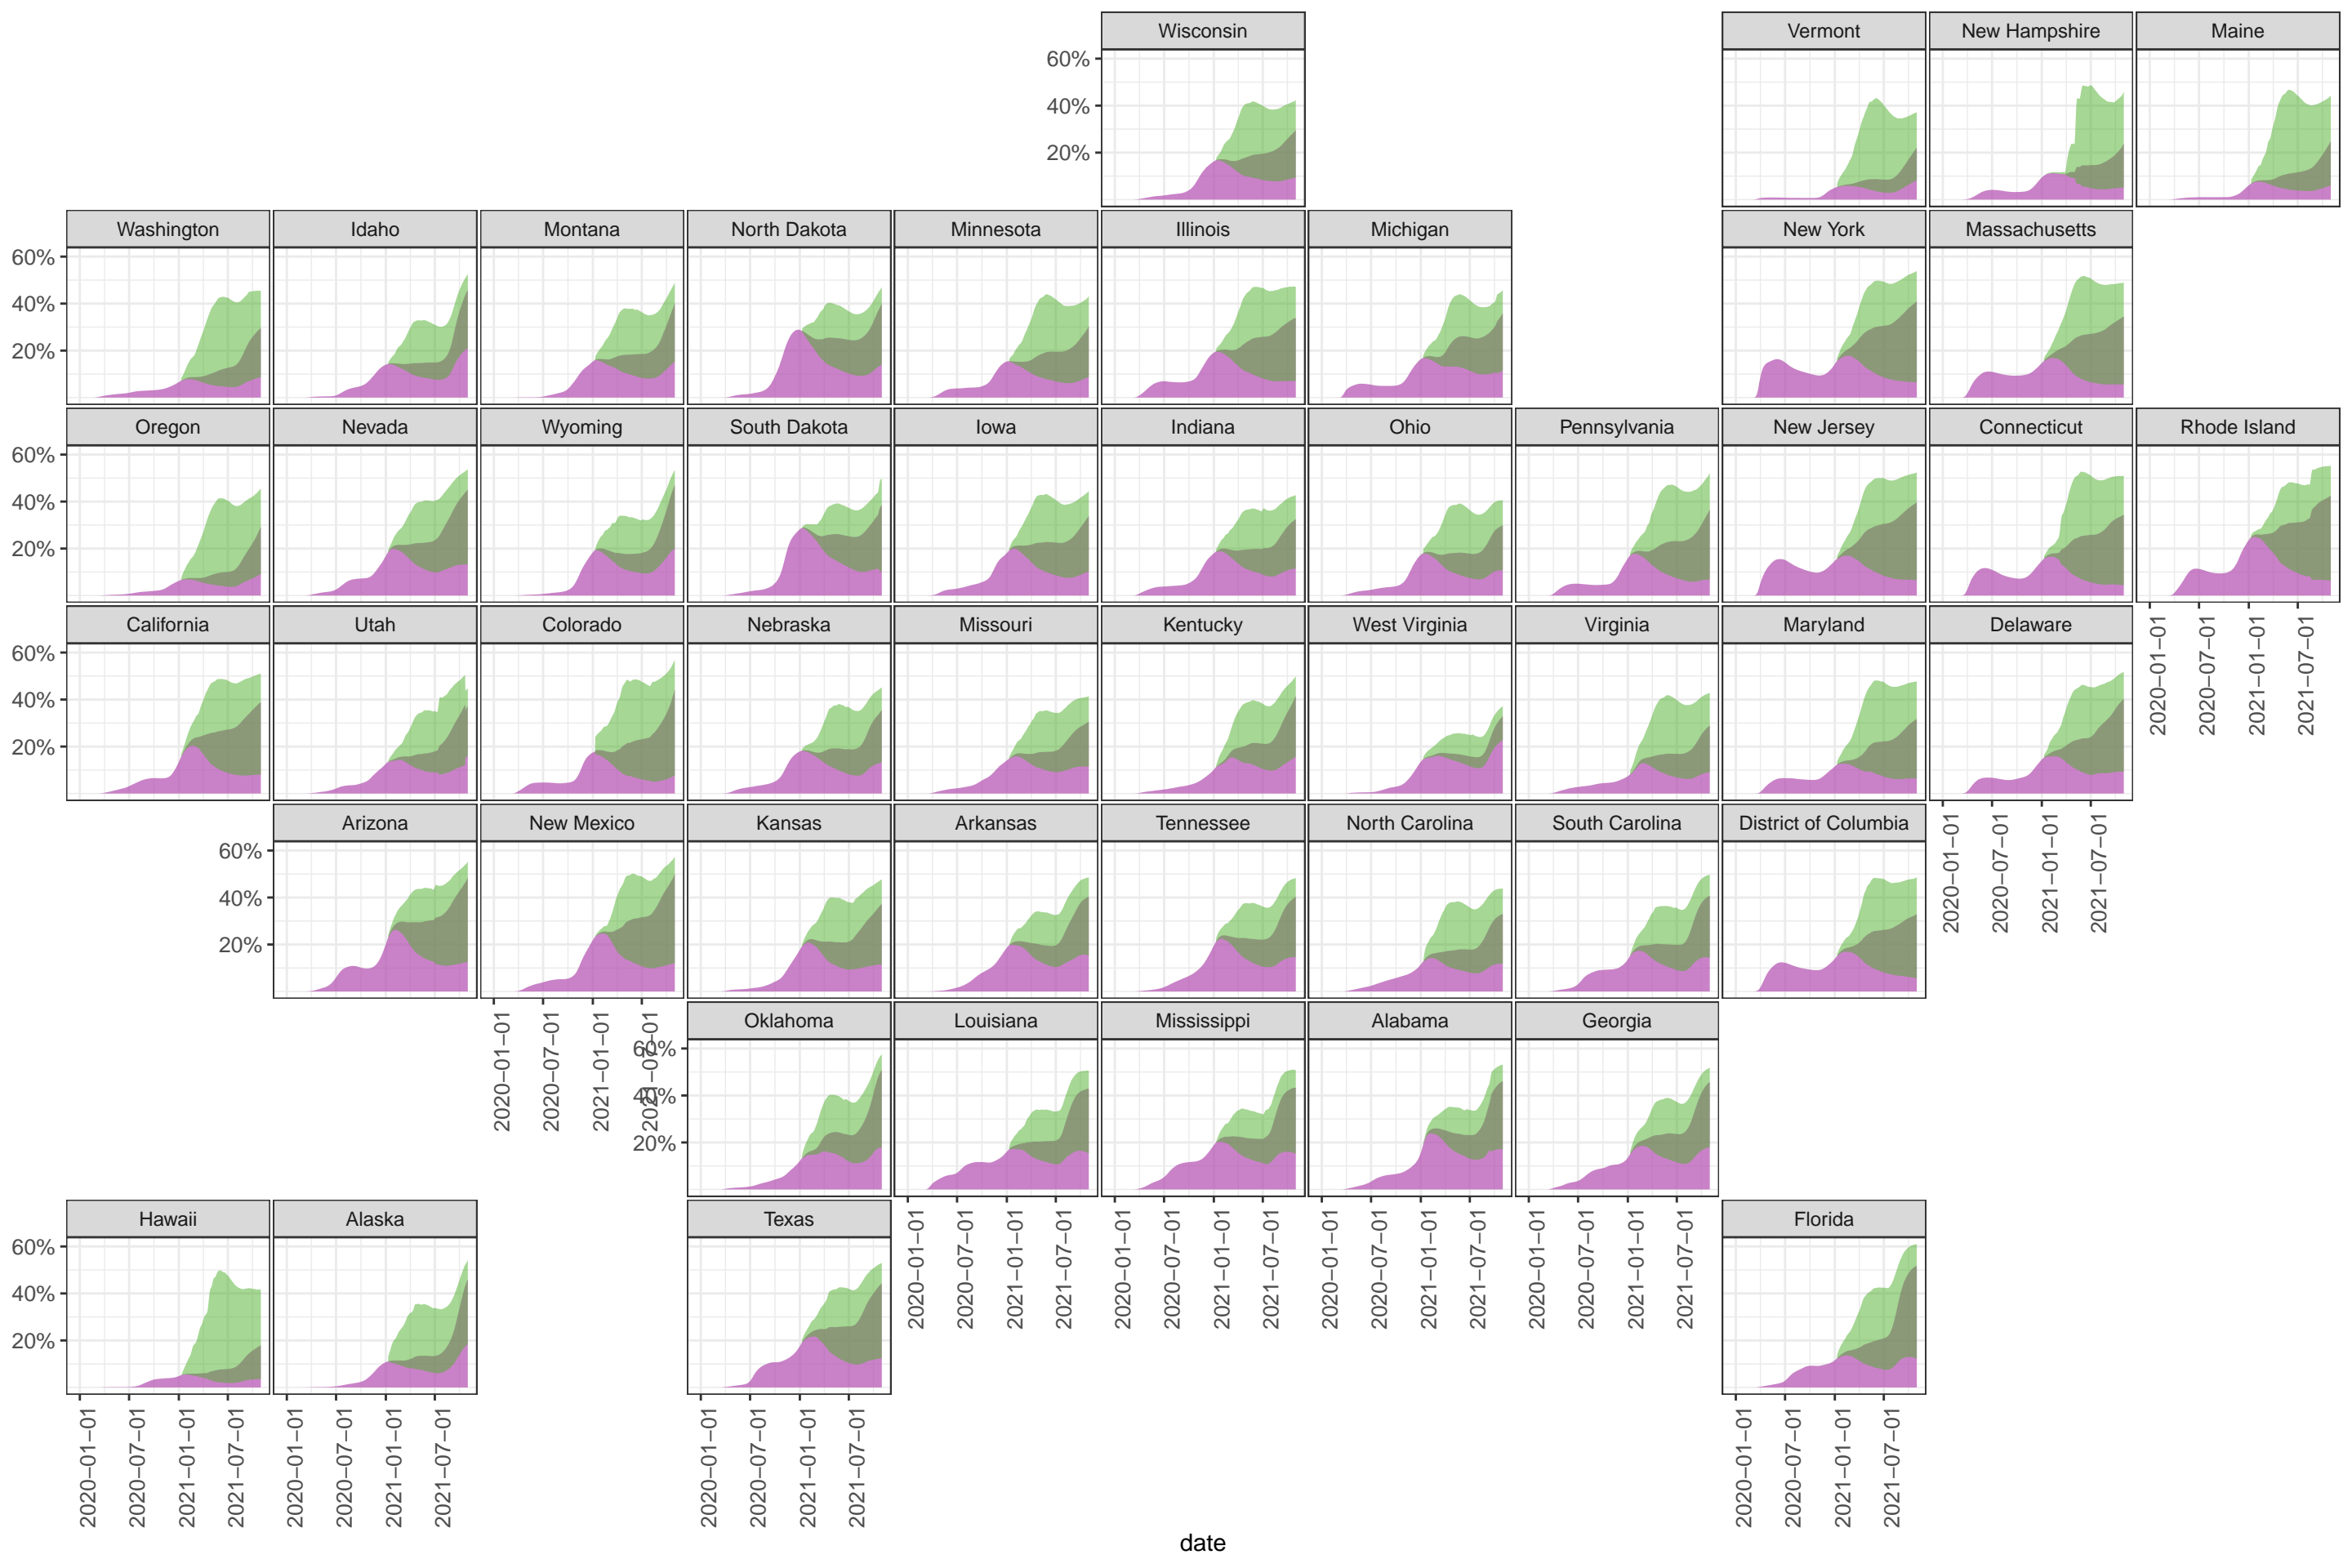

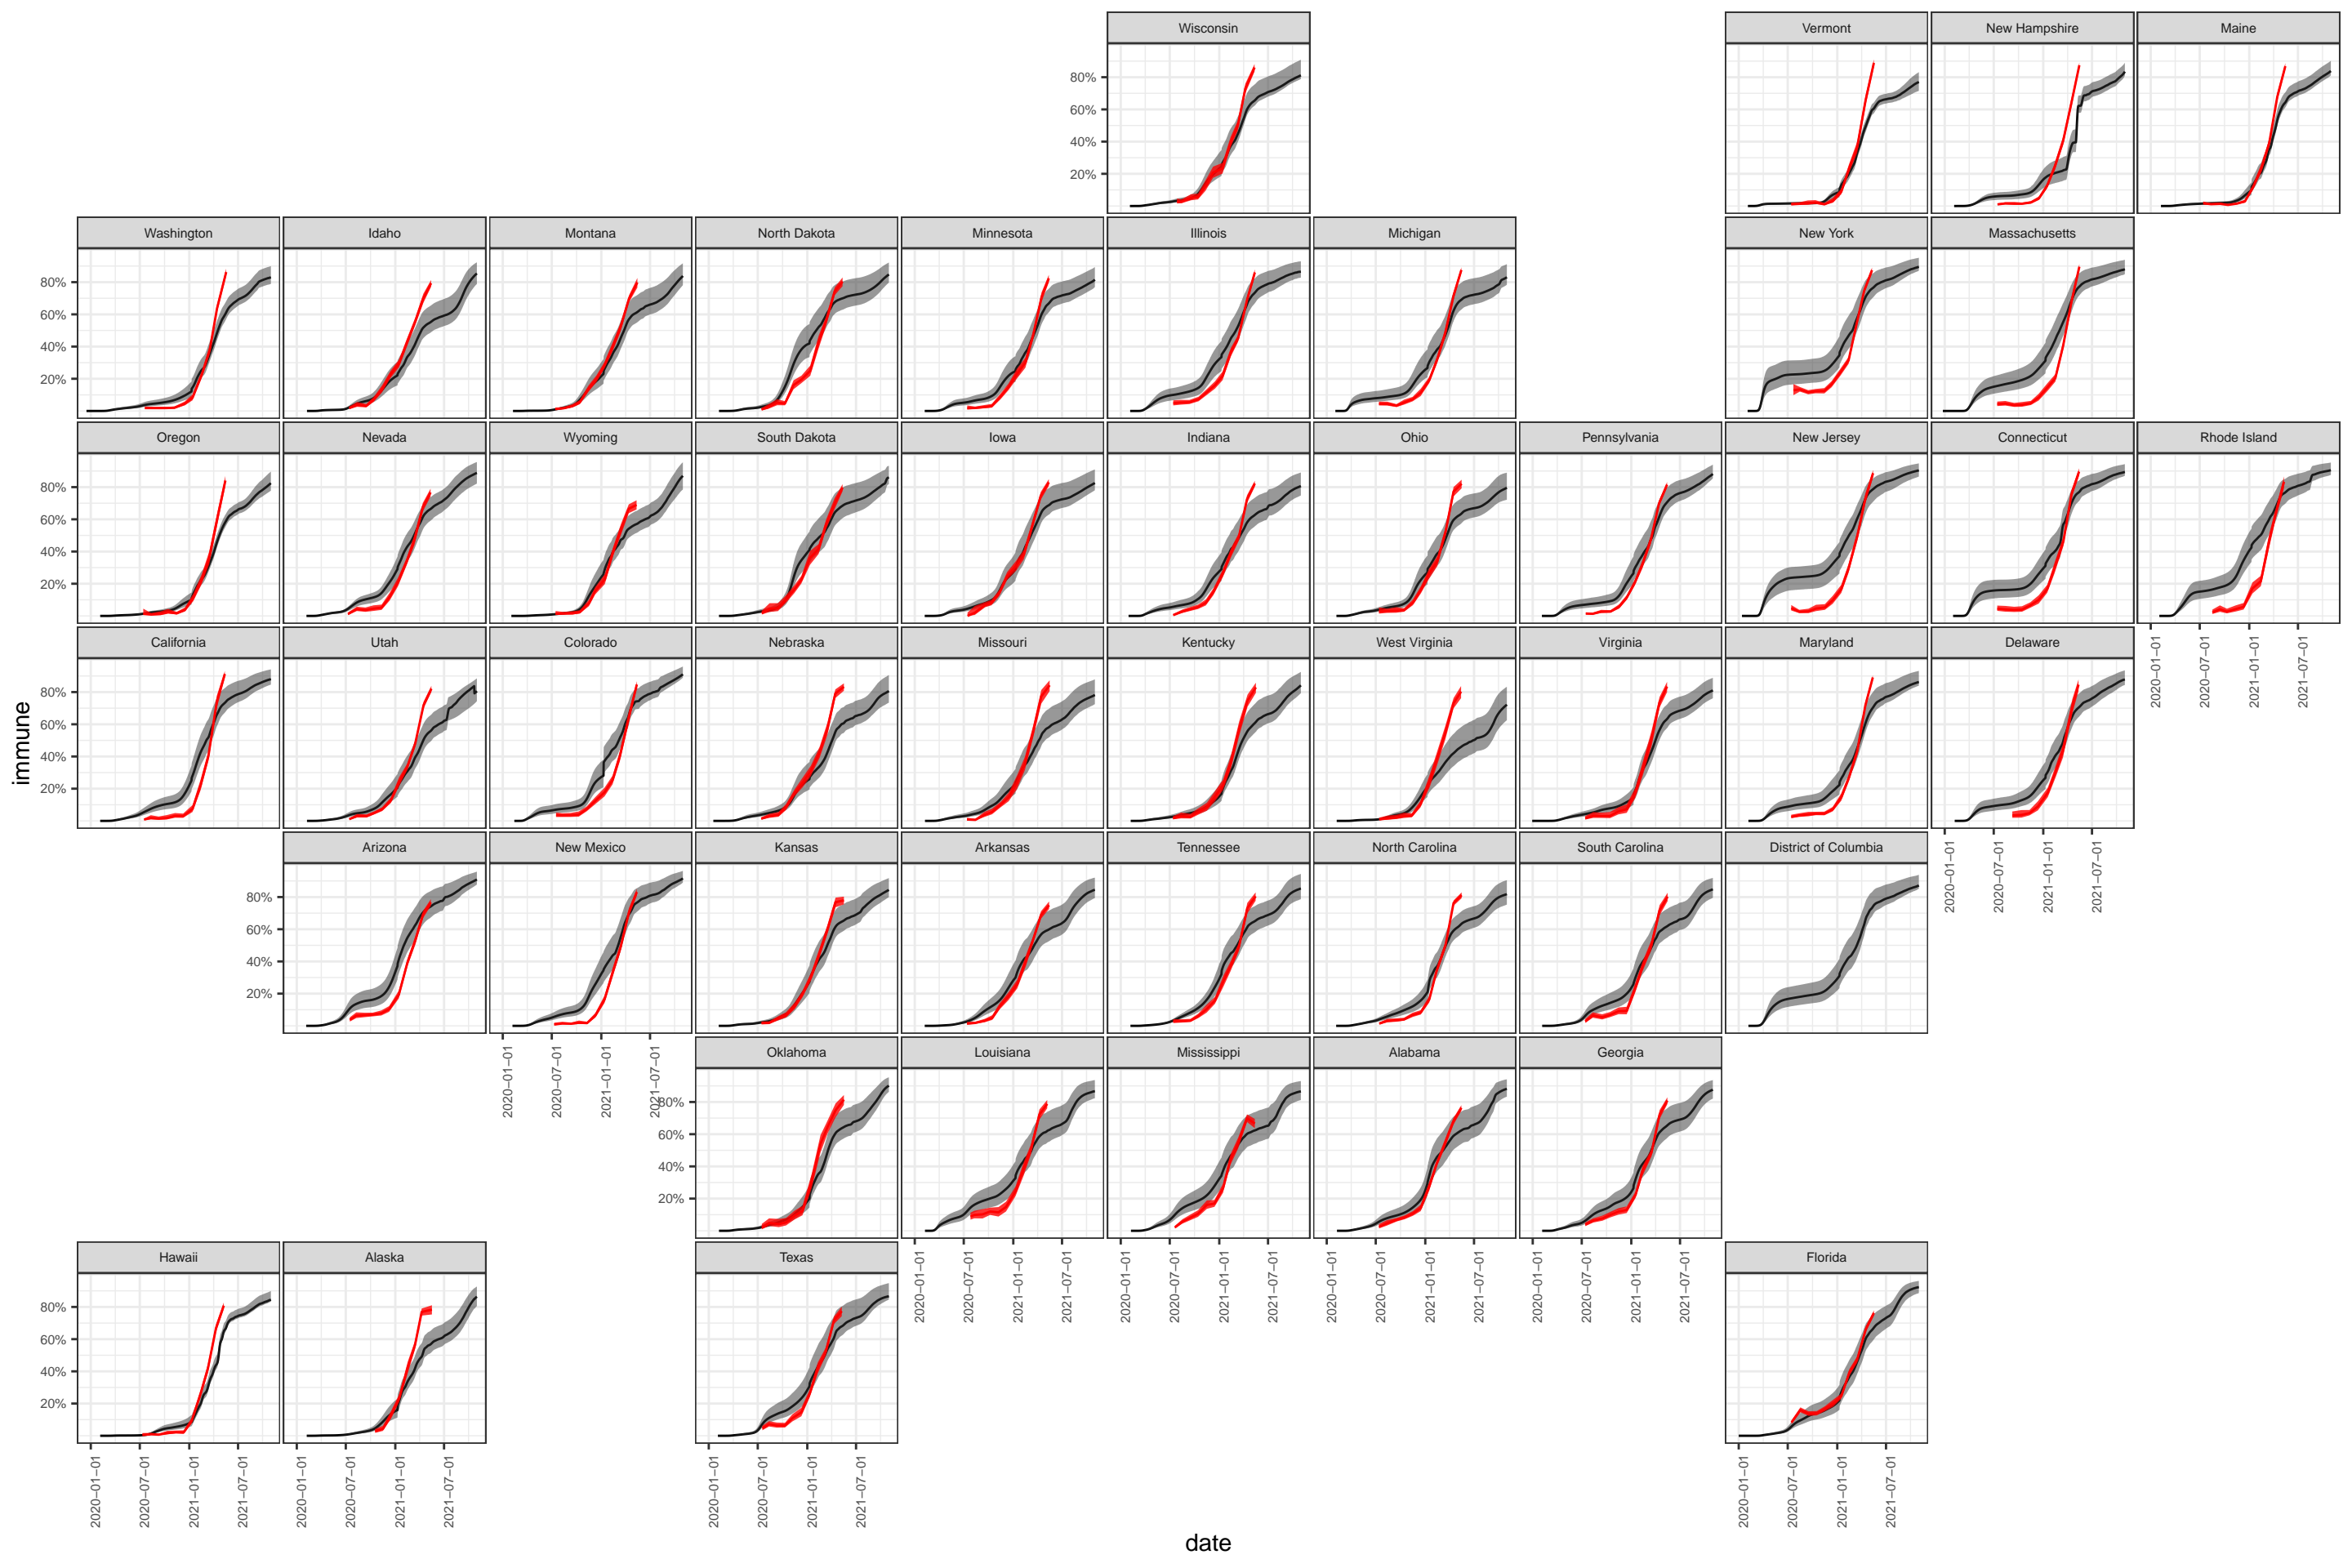

Supplement: Supplementary file [file media-2.pdf]
